# Supplementary material
Source: publisher figshare collection journal article supplement (https://gsajournals.figshare.com/ndownloader/files/13052771)
Supplement: Supplementary file 1 [file 13052771]

| **Experiment #** | **Genotype** | **RNAi** | **RNAi Clone Seq-uenced?** | **Comments** | **# Animals that did not reach adulthood** | **# Adults** | **Percentage of Animals that Developed to Adulthood** |
| --- | --- | --- | --- | --- | --- | --- | --- |
| Experiment 1 | *hsf-1(sy441); rsks-1(mu482)* | *hsf-1* | yes |  | 70 | 0 | 0.0 |
| Experiment 1 | *hsf-1(sy441); rsks-1(mu482)* | *rsks-1* | yes |  | 5 | 102 | 95.3 |
| Experiment 1 | *hsf-1(sy441); rsks-1(mu482)* | Vector Control | yes |  | 1 | 120 | 99.2 |
| Experiment 1 | *hsf-1(sy441)* | *hsf-1* | yes |  | 76 | 0 | 0.0 |
| Experiment 1 | *hsf-1(sy441)* | Vector Control | yes |  | 73 | 6 | 7.6 |
| Experiment 1 | *hsf-1(sy441)* | *rsks-1* | yes |  | 49 | 52 | 51.5 |
| Experiment 1 | wild-type | *hsf-1* | yes |  | 8 | 70 | 89.7 |
| Experiment 1 | wild-type | Vector Control | yes |  | 0 | 64 | 100.0 |
| Experiment 1 | wild-type | *rsks-1* | yes |  | 0 | 138 | 100.0 |
| Experiment 2 | *hsf-1(sy441); rsks-1(mu482)* | Vector Control | yes |  | 1 | 69 | 98.6 |
| Experiment 2 | *hsf-1(sy441)* | *cco-1* | yes |  | 85 | 21 | 19.8 |
| Experiment 2 | *hsf-1(sy441)* | *daf-15* | yes |  | 61 | 41 | 40.2 |
| Experiment 2 | *hsf-1(sy441)* | *daf-2* | yes |  | 91 | 9 | 9.0 |
| Experiment 2 | *hsf-1(sy441)* | *hsb-1* | yes |  | 85 | 22 | 20.6 |
| Experiment 2 | *hsf-1(sy441)* | Vector Control | yes |  | 62 | 16 | 20.5 |
| Experiment 2 | *hsf-1(sy441)* | *ragc-1* | yes |  | 63 | 37 | 37.0 |
| Experiment 2 | *hsf-1(sy441)* | *rsks-1* | yes |  | 54 | 46 | 46.0 |
| Experiment 2 | wild-type | *cco-1* | yes |  | 6 | 39 | 86.7 |
| Experiment 2 | wild-type | *daf-15* | yes |  | 0 | 62 | 100.0 |
| Experiment 2 | wild-type | *daf-2* | yes |  | 0 | 68 | 100.0 |
| Experiment 2 | wild-type | *hsb-1* | yes |  | 0 | 64 | 100.0 |
| Experiment 2 | wild-type | Vector Control | yes |  | 0 | 65 | 100.0 |
| Experiment 2 | wild-type | *ragc-1* | yes |  | 0 | 122 | 100.0 |
| Experiment 2 | wild-type | *rsks-1* | yes |  | 0 | 71 | 100.0 |
| Experiment 3 | *hsf-1(sy441); rsks-1(mu482)* | *daf-16* | yes |  | 0 | 75 | 100.0 |
| Experiment 3 | *hsf-1(sy441); rsks-1(mu482)* | *hsf-1* | yes |  | 41 | 42 | 50.6 |
| Experiment 3 | *hsf-1(sy441); rsks-1(mu482)* | *hsp-4* | yes |  | 0 | 87 | 100.0 |
| Experiment 3 | *hsf-1(sy441); rsks-1(mu482)* | Vector Control | yes |  | 0 | 85 | 100.0 |
| Experiment 3 | *hsf-1(sy441); rsks-1(mu482)* | *pha-4* | yes |  | 6 | 105 | 94.6 |
| Experiment 3 | *hsf-1(sy441); rsks-1(mu482)* | *stc-1* | yes |  | 10 | 114 | 91.9 |
| Experiment 3 | *hsf-1(sy441)* | Vector Control | yes |  | 32 | 32 | 50.0 |
| Experiment 3 | *hsf-1(sy441)* | *rsks-1* | yes |  | 2 | 69 | 97.2 |
| Experiment 3 | wild-type | *hsf-1* | yes |  | 1 | 75 | 98.7 |
| Experiment 3 | wild-type | *hsp-4* | yes |  | 22 | 79 | 78.2 |
| Experiment 3 | wild-type | *pha-4* | yes |  | 2 | 63 | 96.9 |
| Experiment 3 | wild-type | *stc-1* | yes |  | 0 | 33 | 100.0 |
| Experiment 4 | *hsf-1(sy441); rsks-1(mu482)* | *daf-16* | yes |  | 1 | 66 | 98.5 |
| Experiment 4 | *hsf-1(sy441); rsks-1(mu482)* | *hif-1* | yes |  | 0 | 70 | 100.0 |
| Experiment 4 | *hsf-1(sy441); rsks-1(mu482)* | *hsf-1* | yes |  | 105 | 40 | 27.6 |
| Experiment 4 | *hsf-1(sy441); rsks-1(mu482)* | *hsp-4* | yes |  | 8 | 70 | 89.7 |
| Experiment 4 | *hsf-1(sy441); rsks-1(mu482)* | Vector Control | yes |  | 2 | 155 | 98.7 |
| Experiment 4 | *hsf-1(sy441); rsks-1(mu482)* | *pha-4* | yes |  | 0 | 23 | 100.0 |
| Experiment 4 | *hsf-1(sy441); rsks-1(mu482)* | *rsks-1* | yes |  | 2 | 81 | 97.6 |
| Experiment 4 | *hsf-1(sy441); uthIs225[sur-5p::hsf-1(sy441); myo2p::tdTomato]* | *daf-16* | yes |  | 4 | 60 | 93.8 |
| Experiment 4 | *hsf-1(sy441); uthIs225[sur-5p::hsf-1(sy441); myo2p::tdTomato]* | *hsf-1* | yes |  | 71 | 0 | 0.0 |
| Experiment 4 | *hsf-1(sy441); uthIs225[sur-5p::hsf-1(sy441); myo2p::tdTomato]* | *hsp-4* | yes |  | 30 | 21 | 41.2 |
| Experiment 4 | *hsf-1(sy441); uthIs225[sur-5p::hsf-1(sy441); myo2p::tdTomato]* | Vector Control | yes |  | 3 | 109 | 97.3 |
| Experiment 4 | *hsf-1(sy441); uthIs225[sur-5p::hsf-1(sy441); myo2p::tdTomato]* | *pha-4* | yes |  | 3 | 44 | 93.6 |
| Experiment 4 | *hsf-1(sy441); uthIs225[sur-5p::hsf-1(sy441); myo2p::tdTomato]* | *rsks-1* | yes |  | 3 | 53 | 94.6 |
| Experiment 4 | *hsf-1(sy441)* | *hif-1* | yes |  | 100 | 52 | 34.2 |
| Experiment 4 | *hsf-1(sy441)* | *hsf-1* | yes |  | 145 | 0 | 0.0 |
| Experiment 4 | *hsf-1(sy441)* | Vector Control | yes |  | 74 | 44 | 37.3 |
| Experiment 4 | *hsf-1(sy441)* | *rsks-1* | yes |  | 36 | 129 | 78.2 |
| Experiment 4 | wild-type | *hif-1* | yes |  | 0 | 93 | 100.0 |
| Experiment 5 | *hsf-1(sy441); rsks-1(mu482)* | *hsf-1* | yes |  | 61 | 39 | 39.0 |
| Experiment 5 | *hsf-1(sy441); rsks-1(mu482)* | Vector Control | yes |  | 0 | 95 | 100.0 |
| Experiment 5 | *hsf-1(sy441); uthIs225[sur-5p::hsf-1(sy441); myo2p::tdTomato]* | *hsf-1* | yes |  | 120 | 0 | 0.0 |
| Experiment 5 | *hsf-1(sy441); uthIs225[sur-5p::hsf-1(sy441); myo2p::tdTomato]* | Vector Control | yes |  | 1 | 105 | 99.1 |
| Experiment 5 | *hsf-1(sy441)* | *cco-1* | yes |  | 163 | 20 | 10.9 |
| Experiment 5 | *hsf-1(sy441)* | *daf-15* | yes |  | 90 | 24 | 21.1 |
| Experiment 5 | *hsf-1(sy441)* | *daf-2* | yes |  | 102 | 1 | 1.0 |
| Experiment 5 | *hsf-1(sy441)* | *hsb-1* | yes |  | 103 | 11 | 9.6 |
| Experiment 5 | *hsf-1(sy441)* | *hsf-1* | yes |  | 107 | 0 | 0.0 |
| Experiment 5 | *hsf-1(sy441)* | Vector Control | yes |  | 94 | 15 | 13.8 |
| Experiment 5 | *hsf-1(sy441)* | *ragc-1* | yes |  | 81 | 49 | 37.7 |
| Experiment 5 | *hsf-1(sy441)* | *rsks-1* | yes |  | 51 | 79 | 60.8 |
| Experiment 5 | wild-type | *cco-1* | yes |  | 2 | 99 | 98.0 |
| Experiment 5 | wild-type | *hsf-1* | yes |  | 0 | 52 | 100.0 |
| Experiment 5 | wild-type | Vector Control | yes |  | 0 | 69 | 100.0 |
| Experiment 6 | *hsf-1(sy441); rsks-1(mu482)* | *hsf-1* | yes |  | 35 | 15 | 30.0 |
| Experiment 6 | *hsf-1(sy441); rsks-1(mu482)* | Vector Control | yes |  | 0 | 37 | 100.0 |
| Experiment 6 | *hsf-1(sy441); uthIs225[sur-5p::hsf-1(sy441); myo2p::tdTomato]* | *daf-16* | yes |  | 0 | 125 | 100.0 |
| Experiment 6 | *hsf-1(sy441); uthIs225[sur-5p::hsf-1(sy441); myo2p::tdTomato]* | *hif-1* | yes |  | 0 | 105 | 100.0 |
| Experiment 6 | *hsf-1(sy441); uthIs225[sur-5p::hsf-1(sy441); myo2p::tdTomato]* | *hsf-1* | yes |  | 89 | 0 | 0.0 |
| Experiment 6 | *hsf-1(sy441); uthIs225[sur-5p::hsf-1(sy441); myo2p::tdTomato]* | *hsp-4* | yes |  | 24 | 24 | 50.0 |
| Experiment 6 | *hsf-1(sy441); uthIs225[sur-5p::hsf-1(sy441); myo2p::tdTomato]* | Vector Control | yes |  | 0 | 119 | 100.0 |
| Experiment 6 | *hsf-1(sy441); uthIs225[sur-5p::hsf-1(sy441); myo2p::tdTomato]* | *pha-4* | yes |  | 0 | 86 | 100.0 |
| Experiment 6 | *hsf-1(sy441)* | *hsf-1* | yes |  | 231 | 1 | 0.4 |
| Experiment 6 | *hsf-1(sy441)* | Vector Control | yes |  | 127 | 51 | 28.7 |
| Experiment 6 | *hsf-1(sy441)* | *rsks-1* | yes |  | 47 | 106 | 69.3 |
| Experiment 6 | wild-type | *hif-1* | yes |  | 0 | 144 | 100.0 |
| Experiment 7 | *hsf-1(sy441); rsks-1(mu482)* | *cco-1* | yes |  | 6 | 173 | 96.6 |
| Experiment 7 | *hsf-1(sy441); rsks-1(mu482)* | *hsf-1* | yes |  | 78 | 81 | 50.9 |
| Experiment 7 | *hsf-1(sy441); rsks-1(mu482)* | Vector Control | yes |  | 0 | 178 | 100.0 |
| Experiment 7 | *hsf-1(sy441)* | *cco-1* | yes |  | 87 | 4 | 4.4 |
| Experiment 7 | *hsf-1(sy441)* | *daf-15* | yes |  | 80 | 15 | 15.8 |
| Experiment 7 | *hsf-1(sy441)* | *daf-2* | yes |  | 51 | 3 | 5.6 |
| Experiment 7 | *hsf-1(sy441)* | *hsb-1* | yes |  | 72 | 29 | 28.7 |
| Experiment 7 | *hsf-1(sy441)* | *hsf-1* | yes |  | 85 | 1 | 1.2 |
| Experiment 7 | *hsf-1(sy441)* | Vector Control | yes |  | 93 | 17 | 15.5 |
| Experiment 7 | *hsf-1(sy441)* | *ragc-1* | yes |  | 49 | 21 | 30.0 |
| Experiment 7 | *hsf-1(sy441)* | *rsks-1* | yes |  | 41 | 30 | 42.3 |
| Experiment 8 | *hsf-1(sy441); rsks-1(mu482)* | *hsf-1* | yes |  | 101 | 20 | 16.5 |
| Experiment 8 | *hsf-1(sy441); rsks-1(mu482)* | *hsp-4* | yes |  | 2 | 113 | 98.3 |
| Experiment 8 | *hsf-1(sy441); rsks-1(mu482)* | *hsp-6* | yes |  | 117 | 0 | 0.0 |
| Experiment 8 | *hsf-1(sy441); rsks-1(mu482)* | Vector Control | yes |  | 0 | 105 | 100.0 |
| Experiment 8 | *hsf-1(sy441); rsks-1(mu482)* | *pat-10* | yes |  | 17 | 100 | 85.5 |
| Experiment 8 | *hsf-1(sy441); rsks-1(mu482)* | *W04b5.5* | yes |  | 3 | 114 | 97.4 |
| Experiment 8 | *hsf-1(sy441); rsks-1(mu482)* | *xbp-1* | yes |  | 29 | 94 | 76.4 |
| Experiment 8 | *hsf-1(sy441); uthIs225[sur-5p::hsf-1(sy441); myo2p::tdTomato]* | *hsf-1* | yes |  | 103 | 0 | 0.0 |
| Experiment 8 | *hsf-1(sy441); uthIs225[sur-5p::hsf-1(sy441); myo2p::tdTomato]* | *hsp-4* | yes |  | 22 | 98 | 81.7 |
| Experiment 8 | *hsf-1(sy441); uthIs225[sur-5p::hsf-1(sy441); myo2p::tdTomato]* | *hsp-6* | yes |  | 152 | 0 | 0.0 |
| Experiment 8 | *hsf-1(sy441); uthIs225[sur-5p::hsf-1(sy441); myo2p::tdTomato]* | Vector Control | yes |  | 1 | 133 | 99.3 |
| Experiment 8 | *hsf-1(sy441); uthIs225[sur-5p::hsf-1(sy441); myo2p::tdTomato]* | *pat-10* | yes |  | 81 | 33 | 28.9 |
| Experiment 8 | *hsf-1(sy441); uthIs225[sur-5p::hsf-1(sy441); myo2p::tdTomato]* | *W04b5.5* | yes |  | 0 | 141 | 100.0 |
| Experiment 8 | *hsf-1(sy441); uthIs225[sur-5p::hsf-1(sy441); myo2p::tdTomato]* | *xbp-1* | yes |  | 2 | 106 | 98.1 |
| Experiment 8 | *hsf-1(sy441)* | Vector Control | yes |  | 180 | 27 | 13.0 |
| Experiment 8 | *hsf-1(sy441)* | *rsks-1* | yes |  | 137 | 129 | 48.5 |
| Experiment 9 | *hsf-1(sy441); rsks-1(mu482)* | *hsf-1* | yes |  | 75 | 11 | 12.8 |
| Experiment 9 | *hsf-1(sy441); rsks-1(mu482)* | *hsp-4* | yes |  | 7 | 102 | 93.6 |
| Experiment 9 | *hsf-1(sy441); rsks-1(mu482)* | *hsp-6* | yes |  | 82 | 3 | 3.5 |
| Experiment 9 | *hsf-1(sy441); rsks-1(mu482)* | Vector Control | yes |  | 4 | 111 | 96.5 |
| Experiment 9 | *hsf-1(sy441); rsks-1(mu482)* | *pat-10* | yes |  | 27 | 70 | 72.2 |
| Experiment 9 | *hsf-1(sy441); rsks-1(mu482)* | *W04b5.5* | yes |  | 4 | 94 | 95.9 |
| Experiment 9 | *hsf-1(sy441); rsks-1(mu482)* | *xbp-1* | yes |  | 20 | 78 | 79.6 |
| Experiment 9 | *hsf-1(sy441)* | Vector Control | yes |  | 114 | 12 | 9.5 |
| Experiment 9 | *hsf-1(sy441)* | *rsks-1* | yes |  | 84 | 44 | 34.4 |
| Experiment 9 | wild-type | *hsp-4* | yes |  | 0 | 133 | 100.0 |
| Experiment 9 | wild-type | *hsp-6* | yes |  | 42 | 2 | 4.5 |
| Experiment 9 | wild-type | Vector Control | yes |  | 0 | 114 | 100.0 |
| Experiment 9 | wild-type | *pat-10* | yes |  | 96 | 19 | 16.5 |
| Experiment 9 | wild-type | *w04b5.5* | yes |  | 0 | 130 | 100.0 |
| Experiment 9 | wild-type | *xbp-1* | yes |  | 0 | 95 | 100.0 |
| Experiment 10 | *hsf-1(sy441); rsks-1(mu482)* | *hsf-1* | yes |  | 38 | 9 | 19.1 |
| Experiment 10 | *hsf-1(sy441); rsks-1(mu482)* | *hsp-4* | yes |  | 1 | 51 | 98.1 |
| Experiment 10 | *hsf-1(sy441); rsks-1(mu482)* | *hsp-6* | yes |  | 42 | 0 | 0.0 |
| Experiment 10 | *hsf-1(sy441); rsks-1(mu482)* | Vector Control | yes |  | 6 | 54 | 90.0 |
| Experiment 10 | *hsf-1(sy441); rsks-1(mu482)* | *pat-10* | yes |  | 27 | 22 | 44.9 |
| Experiment 10 | *hsf-1(sy441); rsks-1(mu482)* | *w04b5.5* | yes |  | 1 | 53 | 98.1 |
| Experiment 10 | *hsf-1(sy441); rsks-1(mu482)* | *xbp-1* | yes |  | 5 | 25 | 83.3 |
| Experiment 10 | *hsf-1(sy441)* | Vector Control | yes |  | 111 | 15 | 11.9 |
| Experiment 10 | *hsf-1(sy441)* | *rsks-1* | yes |  | 66 | 64 | 49.2 |
| Experiment 10 | wild-type | *hsp-6* | yes |  | 66 | 0 | 0.0 |
| Experiment 10 | wild-type | Vector Control | yes |  | 0 | 104 | 100.0 |
| Experiment 10 | wild-type | *pat-10* | yes |  | 89 | 30 | 25.2 |
| Experiment 10 | wild-type | *w04b5.5* | yes |  | 0 | 93 | 100.0 |
| Experiment 10 | wild-type | *xbp-1* | yes |  | 0 | 79 | 100.0 |
| Experiment 11 | *hsf-1(sy441); rsks-1(mu482)* | *ftt-2* | yes |  | 9 | 120 | 93.0 |
| Experiment 11 | *hsf-1(sy441); rsks-1(mu482)* | *zipt-7.1* | yes |  | 1 | 134 | 99.3 |
| Experiment 11 | *hsf-1(sy441); rsks-1(mu482)* | *hsf-1* | yes |  | 42 | 55 | 56.7 |
| Experiment 11 | *hsf-1(sy441); rsks-1(mu482)* | *hsp-60* | yes |  | 19 | 114 | 85.7 |
| Experiment 11 | *hsf-1(sy441); rsks-1(mu482)* | Vector Control | yes |  | 3 | 84 | 96.6 |
| Experiment 11 | *hsf-1(sy441); rsks-1(mu482)* | *lin-12* |  |  | 0 | 91 | 100.0 |
| Experiment 11 | *hsf-1(sy441); rsks-1(mu482)* | *pek-1* | yes |  | 0 | 91 | 100.0 |
| Experiment 11 | wild-type | *ftt-2* | yes |  | 0 | 117 | 100.0 |
| Experiment 11 | wild-type | *zipt-7.1* | yes |  | 0 | 85 | 100.0 |
| Experiment 11 | wild-type | *hsf-1* | yes |  | 0 | 78 | 100.0 |
| Experiment 11 | wild-type | *hsp-60* | yes |  | 20 | 142 | 87.7 |
| Experiment 11 | wild-type | Vector Control | yes |  | 0 | 105 | 100.0 |
| Experiment 11 | wild-type | *pek-1* | yes |  | 0 | 85 | 100.0 |
| Experiment 12 | *hsf-1(sy441); rsks-1(mu482)* | *hsf-1* | yes |  | 31 | 37 | 54.4 |
| Experiment 12 | *hsf-1(sy441); rsks-1(mu482)* | Vector Control | yes |  | 1 | 78 | 98.7 |
| Experiment 12 | *hsf-1(sy441); rsks-1(mu482)* | *rsks-1* | yes |  | 0 | 82 | 100.0 |
| Experiment 12 | *hsf-1(sy441)* | *hsf-1* | yes |  | 99 | 2 | 2.0 |
| Experiment 12 | *hsf-1(sy441)* | Vector Control | yes |  | 73 | 11 | 13.1 |
| Experiment 12 | *hsf-1(sy441)* | *rsks-1* | yes |  | 21 | 64 | 75.3 |
| Experiment 12 | wild-type | *hsf-1* | yes |  | 0 | 156 | 100.0 |
| Experiment 12 | wild-type | Vector Control | yes |  | 0 | 101 | 100.0 |
| Experiment 12 | wild-type | *rsks-1* | yes |  | 1 | 114 | 99.1 |
| Experiment 12 | *rsks-1(sv31)xhsf-1(sy441)* | *hsf-1* | yes |  | 121 | 11 | 8.3 |
| Experiment 12 | *rsks-1(sv31)xhsf-1(sy441)* | Vector Control | yes |  | 0 | 120 | 100.0 |
| Experiment 12 | *rsks-1(sv31)xhsf-1(sy441)* | *rsks-1* | yes |  | 0 | 127 | 100.0 |
| Experiment 13 | *hsf-1(sy441); rsks-1(mu482); svEx136[unc-36(+) rsks-1(+) sur-5::gfp]* | *hsf-1* | yes | expressing extrachromosomal array | 41 | 10 | 19.6 |
| Experiment 13 | *hsf-1(sy441); rsks-1(mu482); svEx136[unc-36(+) rsks-1(+) sur-5::gfp]* | *hsf-1* | yes | not expressing extrachromsomal array | 51 | 17 | 25.0 |
| Experiment 13 | *hsf-1(sy441); rsks-1(mu482); svEx136[unc-36(+) rsks-1(+) sur-5::gfp]* | Vector Control | yes | expressing extrachromosomal array | 13 | 6 | 31.6 |
| Experiment 13 | *hsf-1(sy441); rsks-1(mu482); svEx136[unc-36(+) rsks-1(+) sur-5::gfp]* | Vector Control | yes | expressing extrachromosomal array | 22 | 3 | 12.0 |
| Experiment 13 | *hsf-1(sy441); rsks-1(mu482); svEx136[unc-36(+) rsks-1(+) sur-5::gfp]* | Vector Control | yes | not expressing extrachromsomal array | 6 | 103 | 94.5 |
| Experiment 13 | *hsf-1(sy441); rsks-1(mu482); svEx136[unc-36(+) rsks-1(+) sur-5::gfp]* | Vector Control | yes | not expressing extrachromsomal array | 1 | 34 | 97.1 |
| Experiment 13 | *hsf-1(sy441); rsks-1(mu482); svEx136[unc-36(+) rsks-1(+) sur-5::gfp]* | *rsks-1* | yes | expressing extrachromosomal array | 4 | 2 | 33.3 |
| Experiment 13 | *hsf-1(sy441); rsks-1(mu482); svEx136[unc-36(+) rsks-1(+) sur-5::gfp]* | *rsks-1* | yes | not expressing extrachromsomal array | 1 | 74 | 98.7 |
| Experiment 13 | *hsf-1(sy441); rsks-1(mu482)* | *hsf-1* | yes |  | 61 | 22 | 26.5 |
| Experiment 13 | *hsf-1(sy441); rsks-1(mu482)* | Vector Control | yes |  | 0 | 118 | 100.0 |
| Experiment 13 | *hsf-1(sy441)* | *hsf-1* | yes |  | 76 | 0 | 0.0 |
| Experiment 13 | *hsf-1(sy441)* | Vector Control | yes |  | 86 | 14 | 14.0 |
| Experiment 13 | *hsf-1(sy441)* | *rsks-1* | yes |  | 44 | 71 | 61.7 |
| Experiment 13 | *wild-type* | *hsf-1* | yes |  | 0 | 40 | 100.0 |
| Experiment 13 | *wild-type* | Vector Control | yes |  | 0 | 61 | 100.0 |
| Experiment 13 | *rsks-1(sv31)xhsf-1(sy441)* | *hsf-1* | yes |  | 82 | 5 | 5.7 |
| Experiment 13 | *rsks-1(sv31)xhsf-1(sy441)* | Vector Control | yes |  | 0 | 82 | 100.0 |
| Experiment 14 | *hsf-1(sy441); rsks-1(mu482); svEx136[unc-36(+) rsks-1(+) sur-5::gfp]* | Vector Control | yes | expressing extrachromosomal array, animals hatched from egg lay | 22 | 1 | 4.3 |
| Experiment 14 | *hsf-1(sy441); rsks-1(mu482); svEx136[unc-36(+) rsks-1(+) sur-5::gfp]* | Vector Control | yes | not expressing extrachromsomal array, animals hatched from egg lay | 2 | 39 | 95.1 |
| Experiment 14 | *hsf-1(sy441); rsks-1(mu482); svEx136[unc-36(+) rsks-1(+) sur-5::gfp]* | *rsks-1* | yes | expressing extrachromosomal array, animals hatched from egg lay | 9 | 13 | 59.1 |
| Experiment 14 | *hsf-1(sy441); rsks-1(mu482); svEx136[unc-36(+) rsks-1(+) sur-5::gfp]* | *rsks-1* | yes | not expressing extrachromsomal array, animals hatched from egg lay | 1 | 38 | 97.4 |
| Experiment 14 | *hsf-1(sy441); rsks-1(mu482)* | *hsf-1* | yes |  | 73 | 49 | 40.2 |
| Experiment 14 | *hsf-1(sy441); rsks-1(mu482)* | Vector Control | yes |  | 0 | 125 | 100.0 |
| Experiment 14 | *hsf-1(sy441)* | *hsf-1* | yes |  | 197 | 3 | 1.5 |
| Experiment 14 | *hsf-1(sy441)* | Vector Control | yes |  | 136 | 44 | 24.4 |
| Experiment 14 | *hsf-1(sy441)* | *rsks-1* | yes |  | 41 | 142 | 77.6 |
| Experiment 14 | *wild-type* | *hsf-1* | yes |  | 0 | 80 | 100.0 |
| Experiment 14 | *wild-type* | Vector Control | yes |  | 0 | 98 | 100.0 |
| Experiment 14 | *rsks-1(sv31)xhsf-1(sy441)* | *hsf-1* | yes |  | 94 | 7 | 6.9 |
| Experiment 14 | *rsks-1(sv31)xhsf-1(sy441)* | Vector Control | yes |  | 0 | 95 | 100.0 |
| Experiment 15 | *hsf-1(sy441)* | *C45H4.13* |  | preliminary screen using RNAi to knockdown genes that were downregulated in rsks-1 mutant in hsf-1 to see if any rescued development. Only 2 plates per condition and no control strain (Vector Control was contam) | 84 | 14 | 14.3 |
| Experiment 15 | *hsf-1(sy441)* | *c54e4.9* |  | preliminary screen using RNAi to knockdown genes that were downregulated in rsks-1 mutant in hsf-1 to see if any rescued development. Only 2 plates per condition and no control strain (Vector Control was contam) | 85 | 12 | 12.4 |
| Experiment 15 | *hsf-1(sy441)* | *ckr-2* |  | preliminary screen using RNAi to knockdown genes that were downregulated in rsks-1 mutant in hsf-1 to see if any rescued development. Only 2 plates per condition and no control strain (Vector Control was contam) | 45 | 9 | 16.7 |
| Experiment 15 | *hsf-1(sy441)* | *F21D9.8* |  | preliminary screen using RNAi to knockdown genes that were downregulated in rsks-1 mutant in hsf-1 to see if any rescued development. Only 2 plates per condition and no control strain (Vector Control was contam) | 71 | 5 | 6.6 |
| Experiment 15 | *hsf-1(sy441)* | *F33h12.6* |  | preliminary screen using RNAi to knockdown genes that were downregulated in rsks-1 mutant in hsf-1 to see if any rescued development. Only 2 plates per condition and no control strain (Vector Control was contam) | 70 | 22 | 23.9 |
| Experiment 15 | *hsf-1(sy441)* | *F43D9.1* |  | preliminary screen using RNAi to knockdown genes that were downregulated in rsks-1 mutant in hsf-1 to see if any rescued development. Only 2 plates per condition and no control strain (Vector Control was contam) | 90 | 13 | 12.6 |
| Experiment 15 | *hsf-1(sy441)* | *H09603.2b* |  | preliminary screen using RNAi to knockdown genes that were downregulated in rsks-1 mutant in hsf-1 to see if any rescued development. Only 2 plates per condition and no control strain (Vector Control was contam) | 57 | 16 | 21.9 |
| Experiment 15 | *hsf-1(sy441)* | *rsks-1* | yes | preliminary screen using RNAi to knockdown genes that were downregulated in rsks-1 mutant in hsf-1 to see if any rescued development. Only 2 plates per condition and no control strain (Vector Control was contam) | 41 | 85 | 67.5 |
| Experiment 15 | *hsf-1(sy441)* | *srg-34* |  | preliminary screen using RNAi to knockdown genes that were downregulated in rsks-1 mutant in hsf-1 to see if any rescued development. Only 2 plates per condition and no control strain (Vector Control was contam) | 64 | 12 | 15.8 |
| Experiment 15 | *hsf-1(sy441)* | *sri-43* |  | preliminary screen using RNAi to knockdown genes that were downregulated in rsks-1 mutant in hsf-1 to see if any rescued development. Only 2 plates per condition and no control strain (Vector Control was contam) | 68 | 8 | 10.5 |
| Experiment 15 | *hsf-1(sy441)* | *T07D10.1* |  | preliminary screen using RNAi to knockdown genes that were downregulated in rsks-1 mutant in hsf-1 to see if any rescued development. Only 2 plates per condition and no control strain (Vector Control was contam) | 75 | 8 | 9.6 |
| Experiment 15 | *hsf-1(sy441)* | *T24A6.4* |  | preliminary screen using RNAi to knockdown genes that were downregulated in rsks-1 mutant in hsf-1 to see if any rescued development. Only 2 plates per condition and no control strain (Vector Control was contam) | 106 | 13 | 10.9 |
| Experiment 15 | *hsf-1(sy441)* | *T24F1.4* |  | preliminary screen using RNAi to knockdown genes that were downregulated in rsks-1 mutant in hsf-1 to see if any rescued development. Only 2 plates per condition and no control strain (Vector Control was contam) | 66 | 28 | 29.8 |
| Experiment 15 | *hsf-1(sy441)* | *W09D6.4* |  | preliminary screen using RNAi to knockdown genes that were downregulated in rsks-1 mutant in hsf-1 to see if any rescued development. Only 2 plates per condition and no control strain (Vector Control was contam) | 71 | 19 | 21.1 |
| Experiment 15 | *hsf-1(sy441)* | *Y4358A.2* |  | preliminary screen using RNAi to knockdown genes that were downregulated in rsks-1 mutant in hsf-1 to see if any rescued development. Only 2 plates per condition and no control strain (Vector Control was contam) | 88 | 22 | 20.0 |
| Experiment 15 | *hsf-1(sy441)* | *y43f8b.10* |  | preliminary screen using RNAi to knockdown genes that were downregulated in rsks-1 mutant in hsf-1 to see if any rescued development. Only 2 plates per condition and no control strain (Vector Control was contam) | 81 | 14 | 14.7 |
| Experiment 15 | *hsf-1(sy441)* | *Y49E10.10* |  | preliminary screen using RNAi to knockdown genes that were downregulated in rsks-1 mutant in hsf-1 to see if any rescued development. Only 2 plates per condition and no control strain (Vector Control was contam) | 114 | 33 | 22.4 |
| Experiment 15 | *hsf-1(sy441)* | *ZK1010.5* |  | preliminary screen using RNAi to knockdown genes that were downregulated in rsks-1 mutant in hsf-1 to see if any rescued development. Only 2 plates per condition and no control strain (Vector Control was contam) | 50 | 24 | 32.4 |
| Experiment 16 | *hsf-1(sy441)* | *F33h12.6* |  | followup of preliminary screen with 4 plates each | 72 | 54 | 42.9 |
| Experiment 16 | *hsf-1(sy441)* | *H09603.2b* |  | followup of preliminary screen with 4 plates each | 66 | 67 | 50.4 |
| Experiment 16 | *hsf-1(sy441)* | Vector Control | yes | followup of preliminary screen with 4 plates each | 71 | 56 | 44.1 |
| Experiment 16 | *hsf-1(sy441)* | *rsks-1* | yes | followup of preliminary screen with 4 plates each | 11 | 100 | 90.1 |
| Experiment 16 | *hsf-1(sy441)* | *T24F1.4* |  | followup of preliminary screen with 4 plates each | 26 | 75 | 74.3 |
| Experiment 16 | *hsf-1(sy441)* | *W09D6.4* |  | followup of preliminary screen with 4 plates each | 46 | 64 | 58.2 |
| Experiment 16 | *hsf-1(sy441)* | *Y4358A.2* |  | followup of preliminary screen with 4 plates each | 56 | 54 | 49.1 |
| Experiment 16 | *hsf-1(sy441)* | *Y49E10.10* |  | followup of preliminary screen with 4 plates each | 56 | 50 | 47.2 |
| Experiment 16 | *hsf-1(sy441)* | *ZK1010.5* |  | followup of preliminary screen with 4 plates each | 59 | 78 | 56.9 |
| Experiment 17 | *hsf-1(sy441)* | *F33h12.6* |  | repeat of followup, 4 plates each | 95 | 44 | 31.7 |
| Experiment 17 | *hsf-1(sy441)* | Vector Control | yes | repeat of followup, 4 plates each | 54 | 37 | 40.7 |
| Experiment 17 | *hsf-1(sy441)* | *rsks-1* | yes | repeat of followup, 4 plates each | 24 | 102 | 81.0 |
| Experiment 17 | *hsf-1(sy441)* | *T24F1.4* |  | repeat of followup, 4 plates each | 77 | 49 | 38.9 |
| Experiment 17 | *hsf-1(sy441)* | *T24F1.4* |  | repeat of followup, 4 plates each | 53 | 42 | 44.2 |
| Experiment 17 | *hsf-1(sy441)* | *Y4358A.2* |  | repeat of followup, 4 plates each | 91 | 45 | 33.1 |
| Experiment 17 | *hsf-1(sy441)* | *ZK1010.5* |  | repeat of followup, 4 plates each | 78 | 57 | 42.2 |
| Experiment 18 | *hsf-1(sy441)* | *aak-2* | yes | preliminary screen using RNAi to knockdown genes from the rsks-1 interactors of wormbase. Only 2 plates per condition | 20 | 46 | 69.7 |
| Experiment 18 | *hsf-1(sy441)* | *age-1* |  | preliminary screen using RNAi to knockdown genes from the rsks-1 interactors of wormbase. Only 2 plates per condition | 26 | 5 | 16.1 |
| Experiment 18 | *hsf-1(sy441)* | *crb-1* |  | preliminary screen using RNAi to knockdown genes from the rsks-1 interactors of wormbase. Only 2 plates per condition | 29 | 23 | 44.2 |
| Experiment 18 | *hsf-1(sy441)* | *hke-4.2* |  | preliminary screen using RNAi to knockdown genes from the rsks-1 interactors of wormbase. Only 2 plates per condition | 19 | 11 | 36.7 |
| Experiment 18 | *hsf-1(sy441)* | *hsp-70* |  | preliminary screen using RNAi to knockdown genes from the rsks-1 interactors of wormbase. Only 2 plates per condition | 37 | 10 | 21.3 |
| Experiment 18 | *hsf-1(sy441)* | *jnk-1* |  | preliminary screen using RNAi to knockdown genes from the rsks-1 interactors of wormbase. Only 2 plates per condition | 19 | 30 | 61.2 |
| Experiment 18 | *hsf-1(sy441)* | *k02b12* |  | preliminary screen using RNAi to knockdown genes from the rsks-1 interactors of wormbase. Only 2 plates per condition | 43 | 34 | 44.2 |
| Experiment 18 | *hsf-1(sy441)* | Vector Control | yes | preliminary screen using RNAi to knockdown genes from the rsks-1 interactors of wormbase. Only 2 plates per condition | 52 | 87 | 62.6 |
| Experiment 18 | *hsf-1(sy441)* | *lgg-1* | yes | preliminary screen using RNAi to knockdown genes from the rsks-1 interactors of wormbase. Only 2 plates per condition | 42 | 17 | 28.8 |
| Experiment 18 | *hsf-1(sy441)* | *mnk-1* |  | preliminary screen using RNAi to knockdown genes from the rsks-1 interactors of wormbase. Only 2 plates per condition | 26 | 51 | 66.2 |
| Experiment 18 | *hsf-1(sy441)* | *par-5* |  | preliminary screen using RNAi to knockdown genes from the rsks-1 interactors of wormbase. Only 2 plates per condition | 52 | 10 | 16.1 |
| Experiment 18 | *hsf-1(sy441)* | *phb-2* |  | preliminary screen using RNAi to knockdown genes from the rsks-1 interactors of wormbase. Only 2 plates per condition | 42 | 26 | 38.2 |
| Experiment 18 | *hsf-1(sy441)* | *rheb-1* |  | preliminary screen using RNAi to knockdown genes from the rsks-1 interactors of wormbase. Only 2 plates per condition | 25 | 50 | 66.7 |
| Experiment 18 | *hsf-1(sy441)* | *rsks-1* | yes | preliminary screen using RNAi to knockdown genes from the rsks-1 interactors of wormbase. Only 2 plates per condition | 7 | 120 | 94.5 |
| Experiment 18 | *hsf-1(sy441)* | *sek-1* |  | preliminary screen using RNAi to knockdown genes from the rsks-1 interactors of wormbase. Only 2 plates per condition | 35 | 31 | 47.0 |
| Experiment 18 | *hsf-1(sy441)* | *sgk-1* |  | preliminary screen using RNAi to knockdown genes from the rsks-1 interactors of wormbase. Only 2 plates per condition | 30 | 25 | 45.5 |
| Experiment 18 | *hsf-1(sy441)* | *sma-4* |  | preliminary screen using RNAi to knockdown genes from the rsks-1 interactors of wormbase. Only 2 plates per condition | 19 | 48 | 71.6 |
| Experiment 18 | *hsf-1(sy441)* | *stdh-1* |  | preliminary screen using RNAi to knockdown genes from the rsks-1 interactors of wormbase. Only 2 plates per condition | 34 | 38 | 52.8 |
| Experiment 19 | *hsf-1(sy441); rsks-1(mu482)* | *hif-1* | yes |  | 0 | 76 | 100.0 |
| Experiment 19 | *hsf-1(sy441); rsks-1(mu482)* | *hsf-1* | yes |  | 48 | 52 | 52.0 |
| Experiment 19 | *hsf-1(sy441); rsks-1(mu482)* | Vector Control | yes |  | 0 | 138 | 100.0 |
| Experiment 19 | *hsf-1(sy441); rsks-1(mu482)* | *skn-1* | yes |  | 1 | 136 | 99.3 |
| Experiment 19 | *hsf-1(sy441)* | Vector Control | yes |  | 100 | 35 | 25.9 |
| Experiment 19 | *hsf-1(sy441)* | *OP50* |  | op50 grown for a few days from stationary phase | 46 | 69 | 60.0 |
| Experiment 19 | *hsf-1(sy441)* | *OP50* |  | op50 grown by RNAi bacteria protocol | 60 | 45 | 42.9 |
| Experiment 19 | *hsf-1(sy441)* | *rsks-1* | yes |  | 45 | 119 | 72.6 |
| Experiment 19 | *hsf-1(sy441)* | *T24F1.4* |  |  | 96 | 38 | 28.4 |
| Experiment 19 | *hsf-1(sy441)xT24F1.4(tm5213)* | Vector Control | yes |  | 125 | 36 | 22.4 |
| Experiment 19 | *hsf-1(sy441)xT24F1.4(tm5213)* | *OP50* |  |  | 45 | 5 | 10.0 |
| Experiment 19 | *hsf-1(sy441)xT24F1.4(tm5213)* | *rsks-1* | yes |  | 58 | 57 | 49.6 |
| Experiment 19 | *hsf-1(sy441)xT24F1.4(tm5397)* | Vector Control | yes |  | 101 | 10 | 9.0 |
| Experiment 19 | wild-type | *hif-1* | yes |  | 0 | 124 | 100.0 |
| Experiment 19 | wild-type | Vector Control | yes |  | 0 | 90 | 100.0 |
| Experiment 19 | wild-type | *skn-1* | yes |  | 0 | 147 | 100.0 |
| Experiment 20 | *hsf-1(sy441); rsks-1(mu482); svEx136[unc-36(+) rsks-1(+) sur-5::gfp]* | Vector Control | yes | expressing extrachromosomal array | 36 | 1 | 2.7 |
| Experiment 20 | *hsf-1(sy441); rsks-1(mu482); svEx136[unc-36(+) rsks-1(+) sur-5::gfp]* | Vector Control | yes | not expressing extrachromsomal array | 0 | 133 | 100.0 |
| Experiment 21 | *hsf-1(sy441); rsks-1(mu482)* | *gcs-1* |  |  | 2 | 90 | 97.8 |
| Experiment 21 | *hsf-1(sy441); rsks-1(mu482)* | Vector Control | yes |  | 0 | 85 | 100.0 |
| Experiment 21 | *hsf-1(sy441)* | *hif-1* | yes |  | 68 | 29 | 29.9 |
| Experiment 21 | *hsf-1(sy441)* | Vector Control | yes |  | 62 | 41 | 39.8 |
| Experiment 21 | *hsf-1(sy441)* | *rsks-1* | yes |  | 29 | 57 | 66.3 |
| Experiment 21 | *hsf-1(sy441)* | *skn-1* | yes |  | 59 | 37 | 38.5 |
| Experiment 21 | wild-type | *gcs-1* |  |  | 0 | 145 | 100.0 |
| Experiment 21 | wild-type | Vector Control | yes |  | 0 | 135 | 100.0 |
| Experiment 22 | *hsf-1(sy441); rsks-1(mu482)* | *cct-2* | yes |  | 27 | 126 | 82.4 |
| Experiment 22 | *hsf-1(sy441); rsks-1(mu482)* | *ced-1* |  |  | 0 | 127 | 100.0 |
| Experiment 22 | *hsf-1(sy441); rsks-1(mu482)* | *gsk-3* | yes |  | 3 | 115 | 97.5 |
| Experiment 22 | *hsf-1(sy441); rsks-1(mu482)* | *hsf-1* | yes |  | 37 | 77 | 67.5 |
| Experiment 22 | *hsf-1(sy441); rsks-1(mu482)* | Vector Control | yes | 0% developed is not normal. Could vector have been contaminated? | 105 | 0 | 0.0 |
| Experiment 22 | *hsf-1(sy441); rsks-1(mu482)* | *pfs-2* | yes |  | 74 | 56 | 43.1 |
| Experiment 22 | *hsf-1(sy441)* | *cct-2* | yes |  | 85 | 0 | 0.0 |
| Experiment 22 | *hsf-1(sy441)* | *crh-1* | yes |  | 117 | 32 | 21.5 |
| Experiment 22 | *hsf-1(sy441)* | *hrp-2* | yes |  | 57 | 47 | 45.2 |
| Experiment 22 | *hsf-1(sy441)* | Vector Control | yes | 0% developed is not normal. Could vector have been contaminated? | 95 | 0 | 0.0 |
| Experiment 22 | *hsf-1(sy441)* | *nhr-14* | yes |  | 85 | 47 | 35.6 |
| Experiment 22 | *hsf-1(sy441)* | *nhr-91* | yes |  | 32 | 58 | 64.4 |
| Experiment 22 | *hsf-1(sy441)* | *rsks-1* | yes |  | 22 | 81 | 78.6 |
| Experiment 22 | *hsf-1(sy441)* | *tiar-1* | yes |  | 56 | 52 | 48.1 |
| Experiment 22 | *hsf-1(sy441)* | *Y55F3AM.3* | yes |  | 77 | 73 | 48.7 |
| Experiment 23 | *hsf-1(sy441); rsks-1(mu482)* | *cct-2* | yes |  | 15 | 55 | 78.6 |
| Experiment 23 | *hsf-1(sy441); rsks-1(mu482)* | *crh-1* | yes |  | 2 | 109 | 98.2 |
| Experiment 23 | *hsf-1(sy441); rsks-1(mu482)* | *hsf-1* | yes |  | 49 | 50 | 50.5 |
| Experiment 23 | *hsf-1(sy441); rsks-1(mu482)* | Vector Control | yes |  | 7 | 111 | 94.1 |
| Experiment 23 | *hsf-1(sy441); rsks-1(mu482)* | *nhr-14* | yes |  | 0 | 116 | 100.0 |
| Experiment 23 | *hsf-1(sy441); rsks-1(mu482)* | *pfs-2* | yes |  | 68 | 31 | 31.3 |
| Experiment 23 | *hsf-1(sy441)* | Vector Control | yes |  | 66 | 36 | 35.3 |
| Experiment 23 | *hsf-1(sy441)* | *nhr-10* | yes |  | 44 | 22 | 33.3 |
| Experiment 23 | *hsf-1(sy441)* | *nhr-91* | yes |  | 45 | 20 | 30.8 |
| Experiment 23 | *hsf-1(sy441)* | *rsks-1* | yes |  | 27 | 28 | 50.9 |
| Experiment 23 | *hsf-1(sy441)* | *tiar-1* | yes |  | 77 | 34 | 30.6 |
| Experiment 23 | wild-type | *cct-2* | yes |  | 35 | 97 | 73.5 |
| Experiment 23 | wild-type | Vector Control | yes |  | 0 | 108 | 100.0 |
| Experiment 23 | wild-type | *pfs-2* | yes |  | 4 | 104 | 96.3 |
| Experiment 24 | *hsf-1(sy441); rsks-1(mu482)* | *hsf-1* | yes |  | 135 | 185 | 57.8 |
| Experiment 24 | *hsf-1(sy441); rsks-1(mu482)* | *hsf-1* | yes |  | 100 | 214 | 68.2 |
| Experiment 24 | *hsf-1(sy441); rsks-1(mu482)* | *hsf-1* | yes |  | 71 | 137 | 65.9 |
| Experiment 24 | *hsf-1(sy441); rsks-1(mu482)* | Vector Control | yes |  | 6 | 341 | 98.3 |
| Experiment 24 | *hsf-1(sy441); rsks-1(mu482)* | Vector Control | yes |  | 17 | 309 | 94.8 |
| Experiment 24 | *hsf-1(sy441); rsks-1(mu482)* | *pha-4* | yes |  | 8 | 163 | 95.3 |
| Experiment 24 | *hsf-1(sy441); rsks-1(mu482)* | *skn-1* | yes |  | 4 | 244 | 98.4 |
| Experiment 24 | *hsf-1(sy441); rsks-1(mu482)* | *skn-1* | yes |  | 9 | 195 | 95.6 |
| Experiment 24 | *hsf-1(sy441); rsks-1(mu482)* | *skn-1* | yes |  | 10 | 351 | 97.2 |
| Experiment 24 | *hsf-1(sy441)* | Vector Control | yes |  | 70 | 40 | 36.4 |
| Experiment 24 | *hsf-1(sy441)* | *rsks-1* | yes |  | 47 | 47 | 50.0 |
| Experiment 24 | *hsf-1(sy441)* | *skn-1* | yes |  | 44 | 55 | 55.6 |
| Experiment 24 | Wild Type | *pha-4* | yes |  | 39 | 96 | 71.1 |
| Experiment 25 | *hsf-1(sy441); rsks-1(mu482)* | *hsf-1* | yes |  | 40 | 55 | 57.9 |
| Experiment 25 | *hsf-1(sy441); rsks-1(mu482)* | *hsf-1* | yes |  | 32 | 49 | 60.5 |
| Experiment 25 | *hsf-1(sy441); rsks-1(mu482)* | *hsf-1* | yes |  | 42 | 66 | 61.1 |
| Experiment 25 | *hsf-1(sy441); rsks-1(mu482)* | Vector Control | yes |  | 7 | 147 | 95.5 |
| Experiment 25 | *hsf-1(sy441); rsks-1(mu482)* | Vector Control | yes |  | 0 | 88 | 100.0 |
| Experiment 25 | *hsf-1(sy441); rsks-1(mu482)* | Vector Control | yes |  | 7 | 95 | 93.1 |
| Experiment 25 | *hsf-1(sy441); rsks-1(mu482)* | Vector Control | yes |  | 0 | 135 | 100.0 |
| Experiment 25 | *hsf-1(sy441); rsks-1(mu482)* | *pha-4* | yes |  | 3 | 98 | 97.0 |
| Experiment 25 | *hsf-1(sy441); rsks-1(mu482)* | *pha-4* | yes |  | 0 | 107 | 100.0 |
| Experiment 25 | *hsf-1(sy441); rsks-1(mu482)* | *pha-4* | yes |  | 3 | 115 | 97.5 |
| Experiment 25 | *hsf-1(sy441); rsks-1(mu482)* | *skn-1* | yes |  | 1 | 105 | 99.1 |
| Experiment 25 | *hsf-1(sy441); rsks-1(mu482)* | *skn-1* | yes |  | 3 | 111 | 97.4 |
| Experiment 25 | *hsf-1(sy441)* | Vector Control | yes |  | 58 | 83 | 58.9 |
| Experiment 25 | *hsf-1(sy441)* | Vector Control | yes |  | 45 | 51 | 53.1 |
| Experiment 25 | *hsf-1(sy441)* | Vector Control | yes |  | 24 | 52 | 68.4 |
| Experiment 25 | *hsf-1(sy441)* | *rsks-1* | yes |  | 32 | 96 | 75.0 |
| Experiment 25 | *hsf-1(sy441)* | *rsks-1* | yes |  | 39 | 99 | 71.7 |
| Experiment 25 | *hsf-1(sy441)* | *rsks-1* | yes |  | 22 | 49 | 69.0 |
| Experiment 25 | wild-type | *pha-4* | yes |  | 3 | 118 | 97.5 |
| Experiment 26 | *rsks-1(mu482)* | Vector Control | yes |  | 4 | 130 | 97.01492537 |
| Experiment 26 | *hsf-1(sy441)* | *rict-1* | yes |  | 26 | 26 | 50 |
| Experiment 26 | *rsks-1(mu482)* | *atg-18* | yes |  | 0 | 75 | 100 |
| Experiment 26 | *hsf-1(sy441); rsks-1(mu482)* | Vector Control | yes |  | 3 | 31 | 91.17647059 |
| Experiment 26 | *hsf-1(sy441); rsks-1(mu482)* | *lgg-1* | yes |  | 4 | 48 | 92.30769231 |
| Experiment 26 | *hsf-1(sy441)* | *rsks-1* | yes |  | 12 | 62 | 83.78378378 |
| Experiment 26 | *rsks-1(mu482)* | *hsf-1* | yes |  | 7 | 81 | 92.04545455 |
| Experiment 26 | *rsks-1(mu482)* | *lgg-1* | yes |  | 4 | 134 | 97.10144928 |
| Experiment 26 | *hsf-1(sy441); rsks-1(mu482)* | *aak-2* | yes |  | 0 | 40 | 100 |
| Experiment 26 | *rsks-1(mu482)* | *argk-1* | yes |  | 4 | 104 | 96.2962963 |
| Experiment 26 | *hsf-1(sy441); rsks-1(mu482)* | *argk-1* | yes |  | 4 | 55 | 93.22033898 |
| Experiment 26 | *rsks-1(mu482)* | *aak-2* | yes |  | 1 | 94 | 98.94736842 |
| Experiment 26 | *hsf-1(sy441)* | Vector Control | yes |  | 46 | 41 | 47.12643678 |
| Experiment 27 | *hsf-1(sy441)* | Vector Control | yes |  | 109 | 52 | 32.3 |
| Experiment 27 | *hsf-1(sy441)* | *rict-1* | yes |  | 119 | 63 | 34.6 |
| Experiment 27 | *hsf-1(sy441)* | *rsks-1* | yes |  | 63 | 63 | 50.0 |
| Experiment 28 | *hsf-1(sy441)* | Vector Control | yes |  | 61 | 35 | 36.45833333 |
| Experiment 28 | *hsf-1(sy441)* | *rict-1* | yes |  | 105 | 28 | 21.05263158 |
| Experiment 28 | *hsf-1(sy441)* | *rsks-1* | yes |  | 49 | 28 | 36.36363636 |
